# Supplementary material
Source: PubMed Central journal article supplement (PMC9546520)
Supplement: mmc1.pdf [file mmc1.pdf]

# THE LANCET

## Infectious Diseases

### Supplementary appendix

This appendix formed part of the original submission and has been peer reviewed. We post it as supplied by the authors.

Supplement to: Angelo KM, Smith T, Camprubí-Ferrer D, et al. Epidemiological and clinical characteristics of patients with monkeypox in the GeoSentinel Network: a cross-sectional study. *Lancet Infect Dis* 2022; published online Oct 7. [https://doi.org/10.1016/S1473-3099\(22\)00651-X](https://doi.org/10.1016/S1473-3099(22)00651-X).

APPENDIX Table 1. Comparison of clinical presentations, treatment, and outcomes among confirmed monkeypox patients with one sexual partner and ≥10 sexual partners reported to GeoSentinel, May 1–July 1, 2022 (N=65)

| Characteristics                       |  |                                           | One partner<br>(N=38) | N  | %  | ≥10 partners<br>(N=27) | N  | %  | p-value |
|---------------------------------------|--|-------------------------------------------|-----------------------|----|----|------------------------|----|----|---------|
| Signs and symptoms (patient reported) |  | Rash or skin lesions anywhere on the body | 28                    | 38 | 75 | 13                     | 27 | 48 | 0.04*^  |
|                                       |  | Fever (subjective or measured)            | 21                    | 38 | 55 | 13                     | 27 | 48 | 0.57^   |
|                                       |  | Genital and/or perianal lesions           | 17                    | 38 | 45 | 15                     | 27 | 56 | 0.39^   |
|                                       |  | Fatigue (malaise)                         | 15                    | 38 | 40 | 8                      | 27 | 30 | 0.41^   |
|                                       |  | Enlarged lymph nodes                      | 14                    | 38 | 37 | 12                     | 27 | 44 | 0.54^   |
|                                       |  | Sore throat (pharyngitis)                 | 11                    | 38 | 29 | 2                      | 27 | 7  | 0.06    |
|                                       |  | Headache                                  | 9                     | 38 | 24 | 2                      | 27 | 7  | 0.10    |
|                                       |  | Muscle aches (myalgia)                    | 9                     | 38 | 24 | 4                      | 27 | 15 | 0.53    |
|                                       |  | Rectal pain                               | 8                     | 38 | 21 | 3                      | 27 | 11 | 0.34    |
|                                       |  | Chills                                    | 6                     | 38 | 1  | 4                      | 27 | 15 | 1       |
|                                       |  | Cough                                     | 2                     | 38 | 5  | 3                      | 27 | 11 | 0.64    |
|                                       |  | Diarrhea                                  | 2                     | 38 | 5  | 1                      | 27 | 4  | 1       |
|                                       |  | Itching (pruritis)                        | 2                     | 38 | 5  | 8                      | 27 | 30 | 0.01*   |
|                                       |  | Sweats                                    | 2                     | 38 | 5  | 4                      | 27 | 15 | 0.22    |
|                                       |  | Urgency to defecate (tenesmus)            | 2                     | 38 | 5  | 2                      | 27 |    | 1       |

|                              |  |                                        |                  |    |    |                  |    |     |         |
|------------------------------|--|----------------------------------------|------------------|----|----|------------------|----|-----|---------|
|                              |  | Back pain                              | 1                | 38 | 3  | 1                | 27 | 4   | 1       |
|                              |  | Pain with urination (dysuria)          | 1                | 38 | 3  | 1                | 27 | 4   | 1       |
|                              |  | Red eyes (conjunctivitis or keratitis) | 1                | 38 | 3  | 0                | 27 | 0   | ..      |
|                              |  | Rectal bleeding                        | 1                | 38 | 3  | 2                | 27 | 7   | 0.57    |
|                              |  | Runny nose (rhinitis)                  | 1                | 38 | 3  | 0                | 27 | 0   | 1       |
|                              |  | Abdominal pain                         | 0                | 38 | 0  | 0                | 27 | 0   | ..      |
|                              |  | Edema                                  | 0                | 38 | 0  | 1                | 27 | 4   | 0.42    |
|                              |  | Eye lesions                            | 0                | 38 | 0  | 0                | 27 | 0   | ..      |
|                              |  | Nausea                                 | 0                | 38 | 0  | 0                | 27 | 0   | ..      |
|                              |  | Pus or blood in stool                  | 0                | 38 | 0  | 1                | 27 | 4   | 0.42    |
|                              |  | Shortness of breath                    | 0                | 38 | 0  | 0                | 27 | 0   | ..      |
|                              |  | Wheezing                               | 0                | 38 | 0  | 0                | 27 | 0   | ..      |
|                              |  | Vomiting                               | 0                | 38 | 0  | 0                | 27 | 0   | ..      |
|                              |  | None                                   | 1                | 38 | 3  | 0                | 27 | 0   | 1       |
|                              |  | Other <sup>a</sup>                     | 1                | 38 | 3  | 0                | 27 | 0   | 1       |
| <b>Physical Exam</b>         |  |                                        |                  | 38 |    |                  | 27 |     |         |
| Documented fever             |  | Yes                                    | 8                | 38 | 21 | 3                | 23 | 13  | 0.51    |
| Rash and/or skin lesions     |  | Yes                                    | 37               | 38 | 97 | 26               | 26 | 100 | 1       |
| Composite rash score, median |  |                                        | 8 (1, 60; 6, 18) | 37 |    | 8 (1, 60; 6, 18) | 26 |     | <0.0001 |

|                                                                      |                              |                                         |    |    |    |    |    |    |                   |
|----------------------------------------------------------------------|------------------------------|-----------------------------------------|----|----|----|----|----|----|-------------------|
| (range; IQR 25 <sup>th</sup><br>and 75 <sup>th</sup><br>percentiles) |                              |                                         |    |    |    |    |    |    |                   |
|                                                                      | Anatomic location(s)         | Genitals                                | 15 | 38 | 40 | 14 | 27 | 52 | 0.32 <sup>^</sup> |
|                                                                      |                              | Trunk                                   | 12 | 37 | 32 | 7  | 27 | 26 | 0.57 <sup>^</sup> |
|                                                                      |                              | Arms                                    | 10 | 37 | 27 | 7  | 27 | 26 | 0.92 <sup>^</sup> |
|                                                                      |                              | Mouth, lips, or oral mucosa             | 10 | 38 | 26 | 3  | 27 | 11 | 0.21              |
|                                                                      |                              | Perianal                                | 10 | 38 | 26 | 8  | 27 | 30 | 0.77 <sup>^</sup> |
|                                                                      |                              | Face                                    | 8  | 38 | 21 | 8  | 27 | 30 | 0.43 <sup>^</sup> |
|                                                                      |                              | Palms of hands                          | 4  | 38 | 11 | 6  | 27 | 22 | 0.30              |
|                                                                      |                              | Head                                    | 2  | 37 | 5  | 1  | 27 | 4  | 1                 |
|                                                                      |                              | Soles of feet                           | 2  | 38 | 5  | 1  | 27 | 4  | 1                 |
|                                                                      |                              | Neck                                    | 0  | 37 | 0  | 1  | 27 | 4  | 0.41              |
|                                                                      |                              | Other <sup>b</sup>                      | 3  | 38 | 8  | 2  | 27 | 7  | 1                 |
|                                                                      | Same stage of<br>development | Yes                                     | 17 | 35 | 49 | 17 | 24 | 71 | 0.09              |
|                                                                      | Same size                    | Yes                                     | 13 | 34 | 38 | 11 | 24 | 46 | 0.56              |
|                                                                      | Characteristics              | Well-circumscribed                      | 27 | 35 | 77 | 17 | 24 | 71 | 0.58 <sup>^</sup> |
|                                                                      |                              | Umbilicated                             | 24 | 35 | 69 | 16 | 24 | 67 | 0.88 <sup>^</sup> |
|                                                                      |                              | Deep seated and profound in<br>the skin | 17 | 35 | 49 | 7  | 24 | 29 | 0.14 <sup>^</sup> |
|                                                                      |                              | Other <sup>c</sup>                      | 10 | 35 | 29 | 8  | 24 | 33 | 0.70 <sup>^</sup> |

|                    |                            |                                |    |    |    |    |    |     |      |
|--------------------|----------------------------|--------------------------------|----|----|----|----|----|-----|------|
| Lymphadenopathy    |                            | Yes                            | 18 | 37 | 49 | 17 | 27 | 63  | 0-26 |
|                    | Anatomic location(s)       | Inguinal                       | 12 | 18 | 67 | 11 | 15 | 73  | 0-72 |
|                    |                            | Cervical                       | 8  | 18 | 44 | 4  | 15 | 27  | 0-47 |
|                    |                            | Submandibular                  | 3  | 18 | 17 | 0  | 15 | 0   | 0-23 |
|                    |                            | Axillary                       | 2  | 18 | 11 | 0  | 15 | 0   | 0-49 |
|                    |                            | Other <sup>d</sup>             | 1  | 18 | 6  | 0  | 15 | 0   | 1    |
| Other STI          |                            | Yes                            | 6  | 38 | 16 | 4  | 24 | 17  | 1    |
| <b>Treatment</b>   |                            |                                |    |    |    |    |    |     |      |
| Received treatment |                            | Tecovirimat (ST-246)           | 3  | 38 | 8  | 1  | 27 | 4   | 0-64 |
|                    |                            | Cidofovir                      | 1  | 38 | 3  | 4  | 27 | 15  | 0-15 |
|                    |                            | Brincidofovir                  | 0  | 38 | 0  | 0  | 27 | 0   | ..   |
|                    |                            | Vaccinia immune globulin (VIG) | 0  | 38 | 0  | 0  | 27 | 0   | ..   |
|                    |                            | No known monkeypox treatment   | 34 | 38 | 90 | 21 | 27 | 78  | 0-30 |
| <b>Outcomes</b>    |                            |                                |    |    |    |    |    |     |      |
| Hospitalized       |                            | Yes                            | 7  | 38 | 18 | 1  | 27 | 4   | 0-13 |
|                    | Reason for hospitalization | Severe illness                 | 3  | 7  | 43 | 1  | 1  | 100 | 1    |
|                    |                            | Need for isolation             | 2  | 7  | 29 | 0  | 1  | 0   | 1    |
|                    |                            | Other <sup>e</sup>             | 2  | 7  | 29 | 0  | 1  | 0   | 1    |

|                         |  |                              |    |    |    |    |    |    |      |
|-------------------------|--|------------------------------|----|----|----|----|----|----|------|
| Outcome at last contact |  | Alive and discharged         | 35 | 38 | 92 | 26 | 27 | 96 | 0.64 |
|                         |  | Alive and still hospitalized | 3  | 38 | 8  | 1  | 27 | 4  | 0.64 |
|                         |  | Deceased                     | 0  | 38 | 0  | 0  | 27 | 0  | ..   |

IQR = interquartile range

STI = sexually transmitted infection

<sup>a</sup>Other symptom was poor appetite/weight loss

<sup>b</sup>Other anatomic locations included inguinal (n=2), buttocks, fingers, and back

<sup>c</sup>Other characteristics included descriptions such as papules, vesicles, ulcers, necrosis, etc.

<sup>d</sup>Other anatomic locations was pre-auricular

<sup>e</sup>Other reasons for hospitalization were supportive care (n=3)

<sup>^</sup>Chi-square p-value; all other tests are Fisher's exact tests; Wilcox rank test for composite rash score
